# Supplementary material for: CTLA-4 expressing innate lymphoid cells modulate mucosal homeostasis in a microbiota dependent manner
Source: PubMed Central journal article supplement (PMC11535242; doi:10.1038/s41467-024-51719-6), 2024-11-04
Supplement: 41467_2024_51719_MOESM3_ESM.pdf [file 41467_2024_51719_MOESM3_ESM.pdf]

## **Description of Additional Supplementary Files**

**Supplementary Data 1:** Demographic patient meta data from consented volunteers in Figure 5a
