# Supplementary material for: CTLA-4 expressing innate lymphoid cells modulate mucosal homeostasis in a microbiota dependent manner
Source: Springer Nature journal article supplement (doi:10.1038/s41467-024-51719-6), 2024-11-04
Supplement: MOESM1 [file 41467_2024_51719_MOESM1_ESM.pdf]

Supplementary Information for “CTLA-4 expressing innate lymphoid cells modulate mucosal homeostasis in a microbiota dependent manner”

By: Jonathan W. Lo et al.

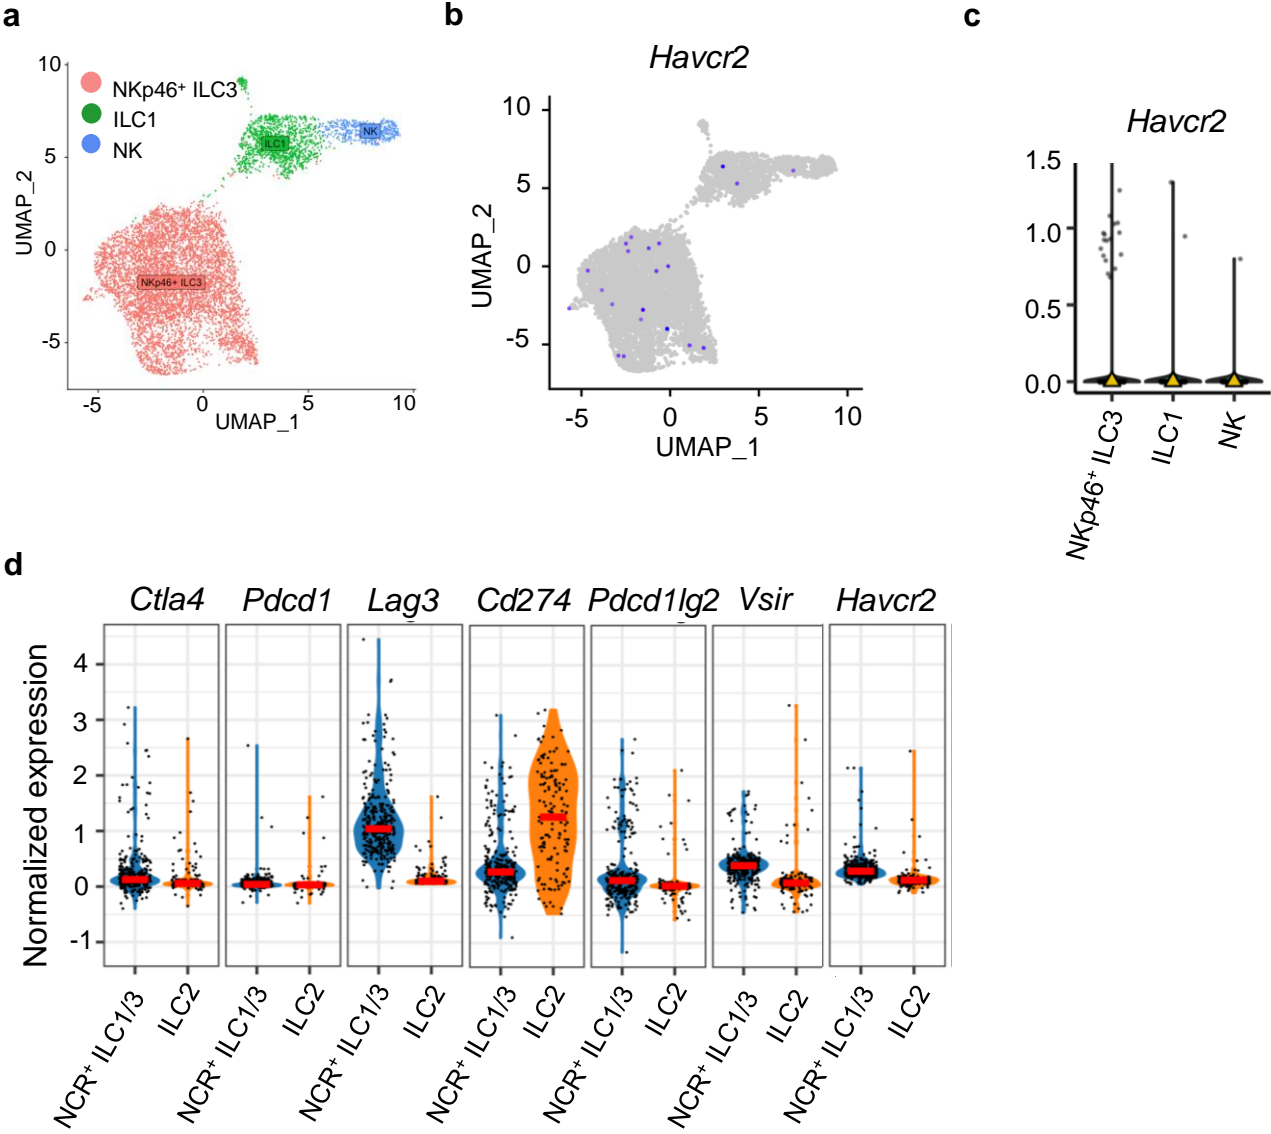

**Supplementary Figure 1. The immune checkpoint transcriptional landscape across murine intestinal ILC clusters**

**(a)** UMAP plot showing the three populations of NKp46+ sorted cells previously identified by Krzywinska et al. **(b)** UMAP plots and **(c)** violin plots showing the expression of *Havcr2* across the three subsets of ILC identified by Krzywinska et al. (median shown by the yellow triangle). **(d)** Violin plots showing the expression of canonical immune checkpoints across the two ILC subsets identified in CD45+ sorted cells from healthy wild-type BALB/c mice.

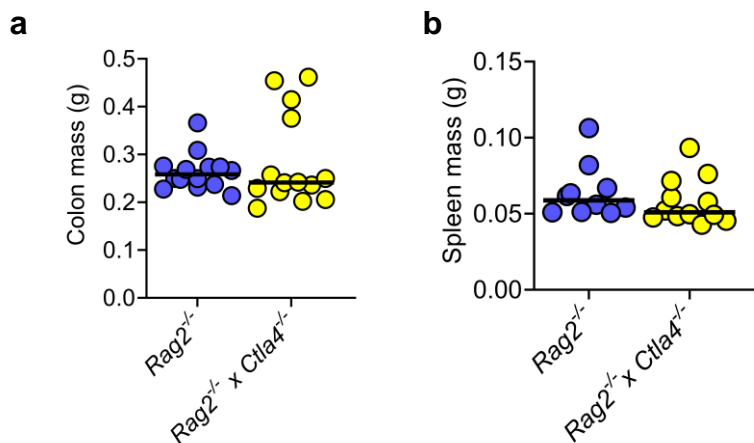

**Supplementary Figure 2. Lack of spontaneous inflammatory disease in *Rag2*<sup>-/-</sup> x *Ctla4*<sup>-/-</sup> mice**

**(a)** Summary statistics showing colon and **(b)** spleen mass between *Rag2*<sup>-/-</sup> mice (n=14 for colon, n=10 for spleen) and *Rag2*<sup>-/-</sup> *Ctla4*<sup>-/-</sup> mice (n=14 for colon, n=12 for spleen).



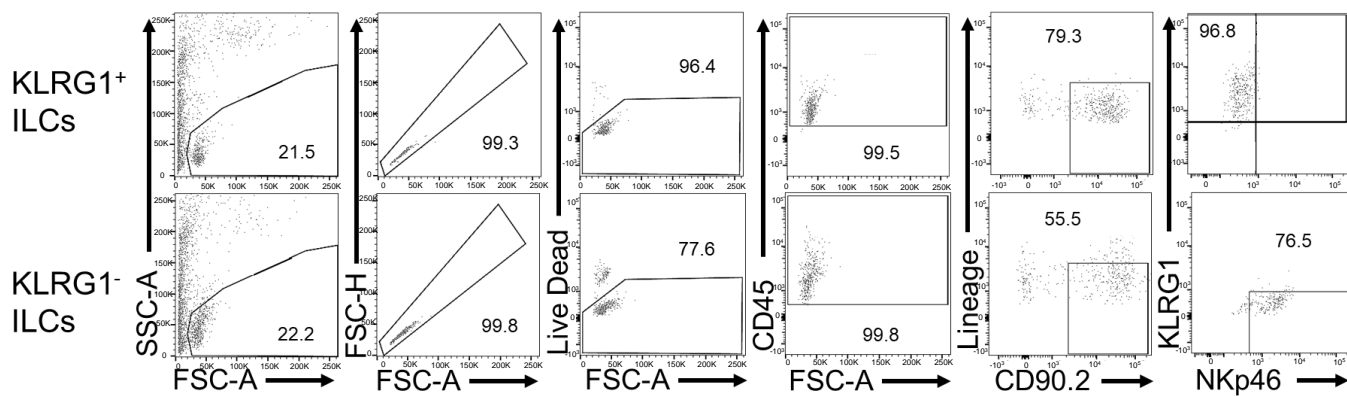

**Supplementary Figure 4. Gating strategy for *in vitro* cultured murine ILC subsets**  
 Gating strategy used in wild-type mice to identify KLRG1<sup>+</sup> and KLRG1<sup>-</sup> ILCs.

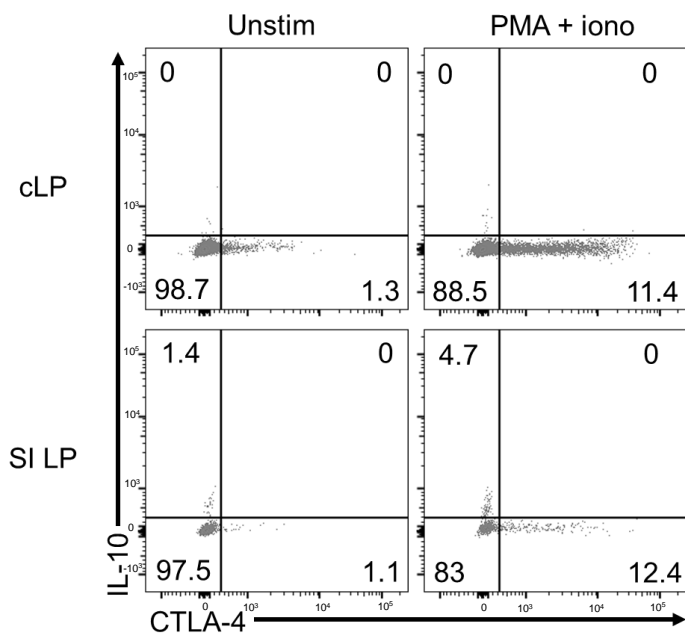

### Supplementary Figure 5. CTLA-4 expressing ILCs do not produce IL-10

Representative flow cytometry plot showing IL-10 production from CTLA-4<sup>+</sup> ILCs after 4 hours of PMA and ionomycin stimulation (n=3)

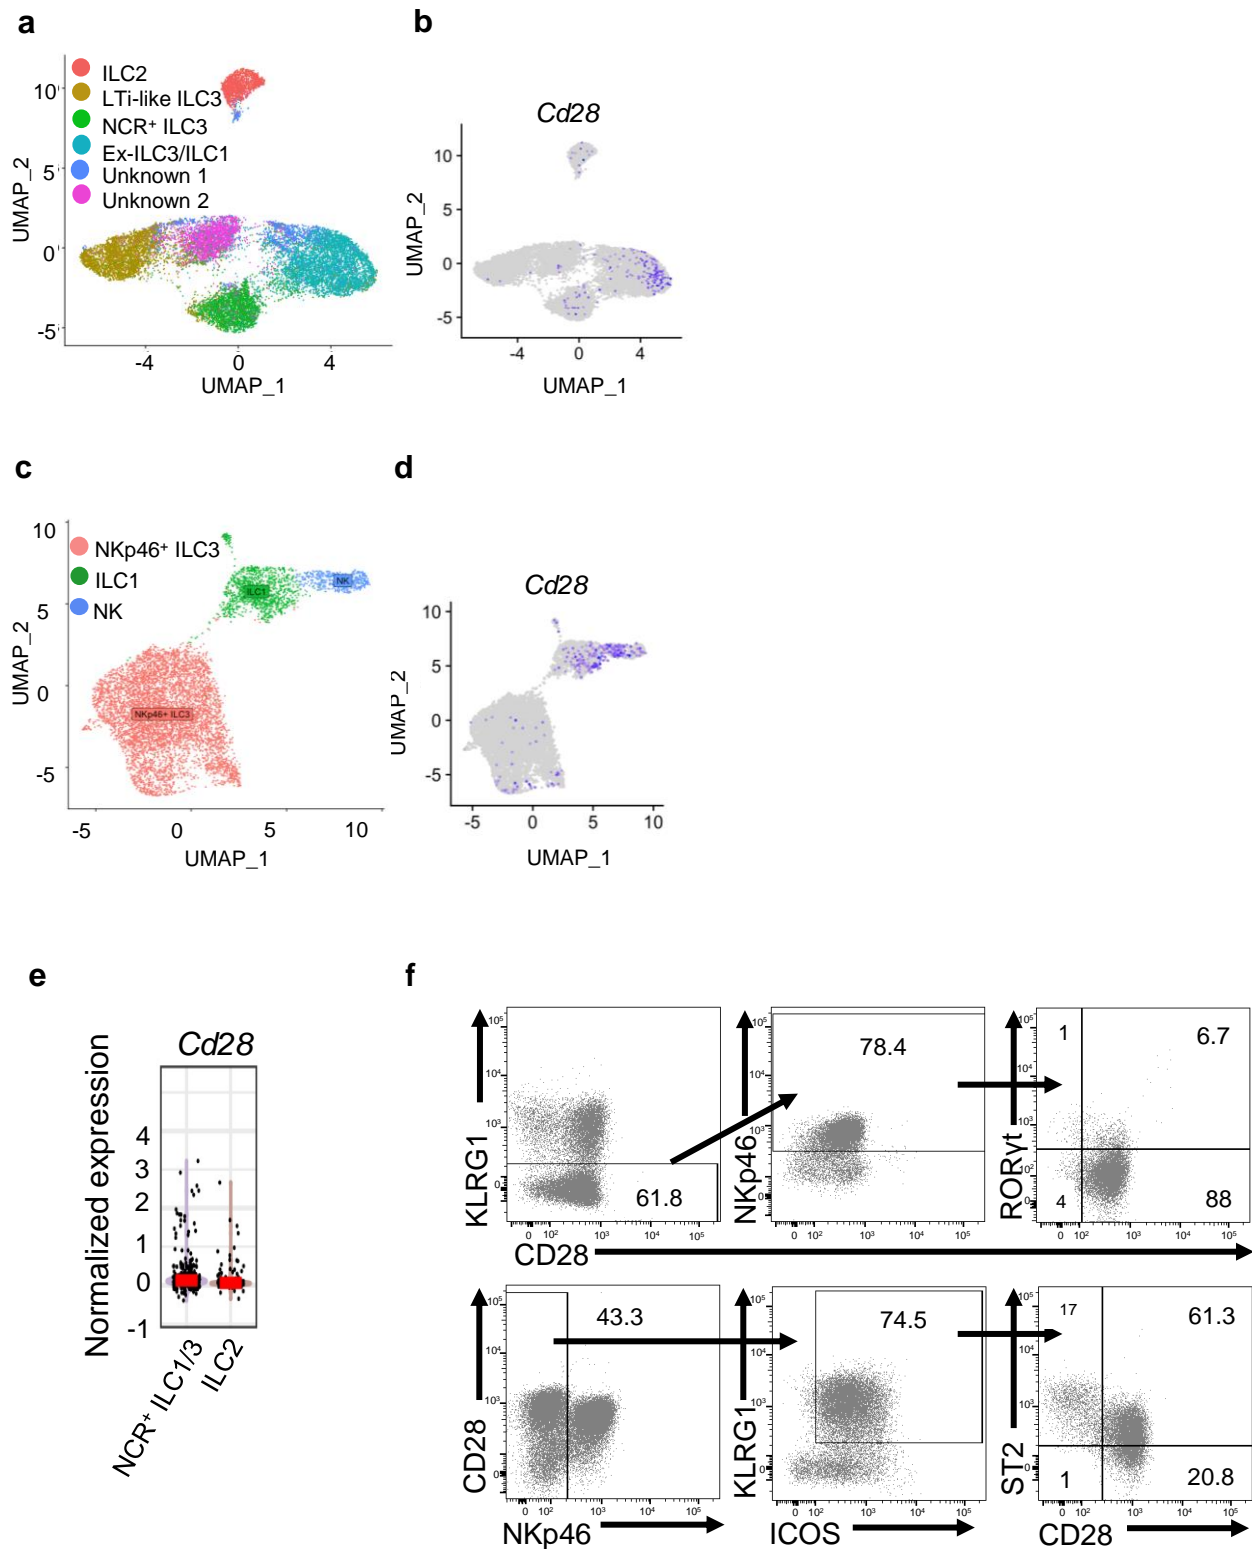

**Supplementary Figure 6. CD28 is expressed across murine ILC subsets using both single cell RNA-seq and flow cytometry**

**(a)** UMAP plot showing the six ILC populations previously identified from CD45<sup>+</sup> Lin<sup>-</sup> CD127<sup>+</sup> sorted cells by Fiancette et al. **(b)** UMAP plot showing the expression of *Cd28* across the six identified ILC subsets. **(c)** UMAP plot showing the three populations of Nkp46<sup>+</sup> sorted cells previously identified by Krzywinska et al. **(d)** UMAP plot showing the expression of *Cd28* across the three identified ILC populations. **(e)** Violin plot showing the expression of *Cd28* across the two identified ILC populations identified from Lo et al.. **(f)** cLP leukocytes were isolated from BALB/c mice for flow cytometry analysis. Representative flow plots showing CD28 expression in KLRG1<sup>-</sup> Nkp46<sup>+</sup> ILC1 and ILC3 and Nkp46<sup>-</sup> ICOS<sup>+</sup> KLRG1<sup>+</sup> ST2<sup>-/-</sup> ILC2 are demonstrated.

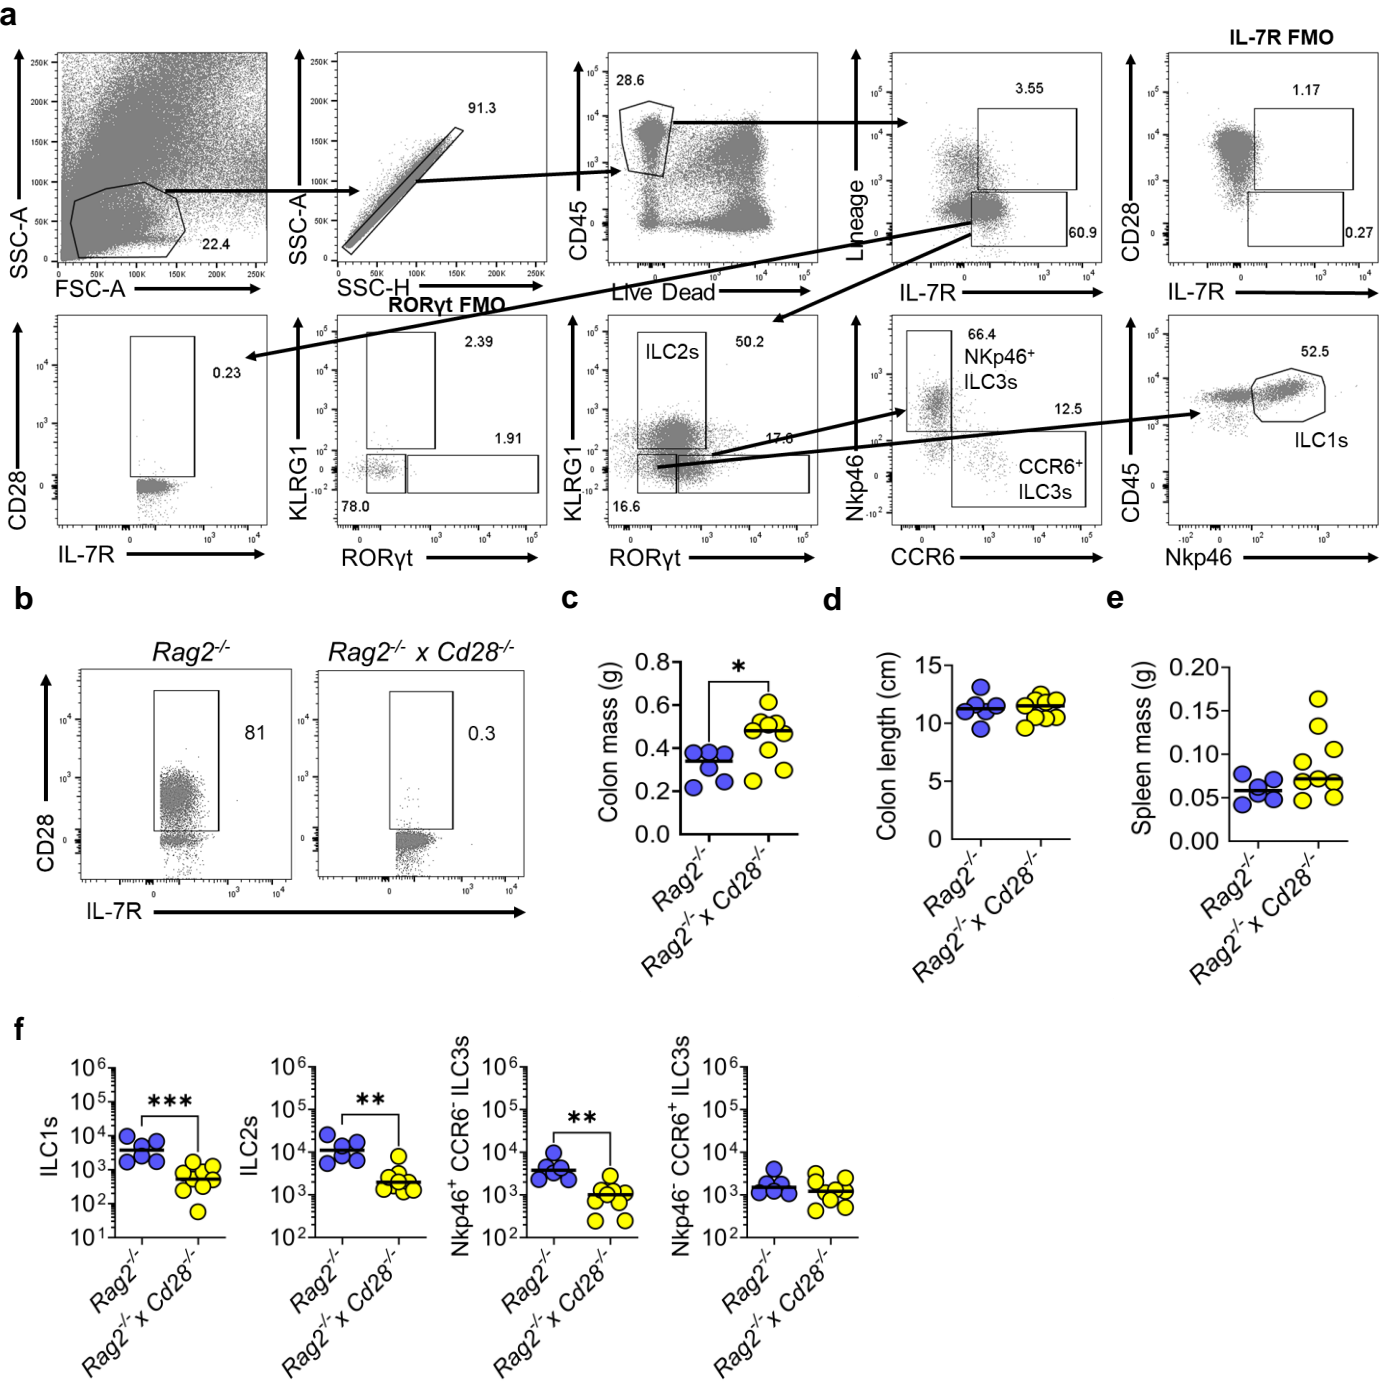

**Supplementary Figure 7. CD28 can modulate ILC numbers in the colon**

**(a)** Gating strategy used to identify ILCs in *Rag2*<sup>-/-</sup> x *Cd28*<sup>-/-</sup> **(b)** Representative flow plot showing loss of CD28 in *Rag2*<sup>-/-</sup> x *Cd28*<sup>-/-</sup> **(c)** Summary dot plot showing colon mass, **(d)** colon length and **(e)** spleen mass between *Rag2*<sup>-/-</sup> (n=6) and *Rag2*<sup>-/-</sup> x *Cd28*<sup>-/-</sup> (n=9) **(f)** Summary dot plot absolute cell numbers in the 4 ILC populations identified in the colonic lamina propria between *Rag2*<sup>-/-</sup> (n=6) and *Rag2*<sup>-/-</sup> x *Cd28*<sup>-/-</sup> (n=9). \* P<0.05 \*\* P<0.01 \*\*\* P<0.001 Mann Whitney U Test for d-f.



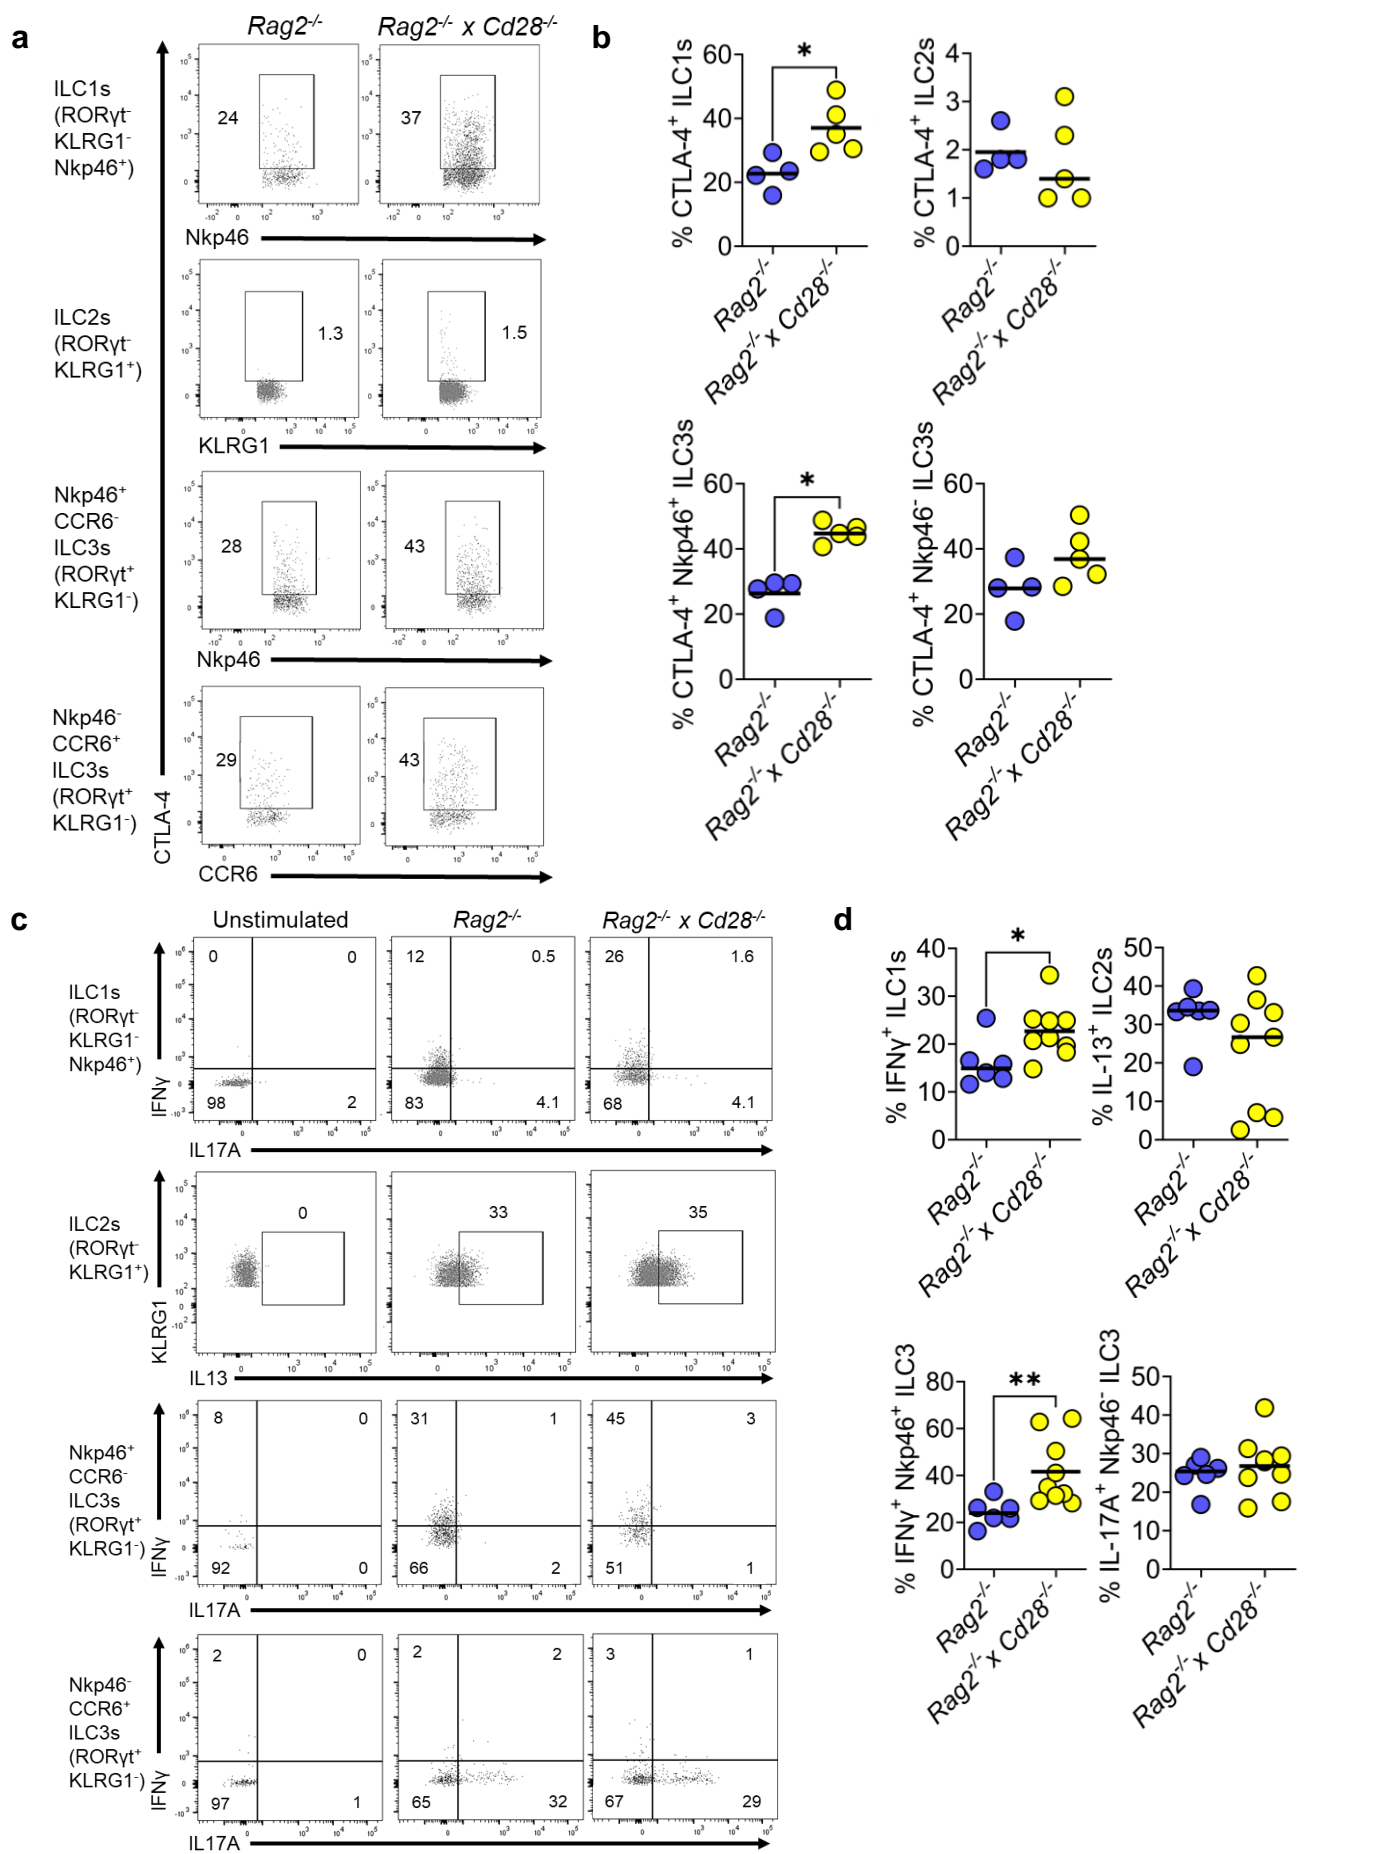

**Supplementary Figure 8. CD28 can modulate CTLA-4 expression and cytokine production**

**(a)** Representative flow plots and **(b)** summary dot plot of CTLA-4<sup>+</sup> ILC in the 4 populations identified between *Rag2*<sup>-/-</sup> (n=4) and *Rag2*<sup>-/-</sup> x *Cd28*<sup>-/-</sup> (n=5) after PMA and ionomycin stimulation **(c)** Representative flow plots and **(d)** Summary dot plot showing changes in cytokines in the 4 identified ILC subsets between *Rag2*<sup>-/-</sup> (n=6) and *Rag2*<sup>-/-</sup> x *Cd28*<sup>-/-</sup> (n=9). \* P<0.05 \*\* P<0.01 Mann Whitney U Test for b and d.

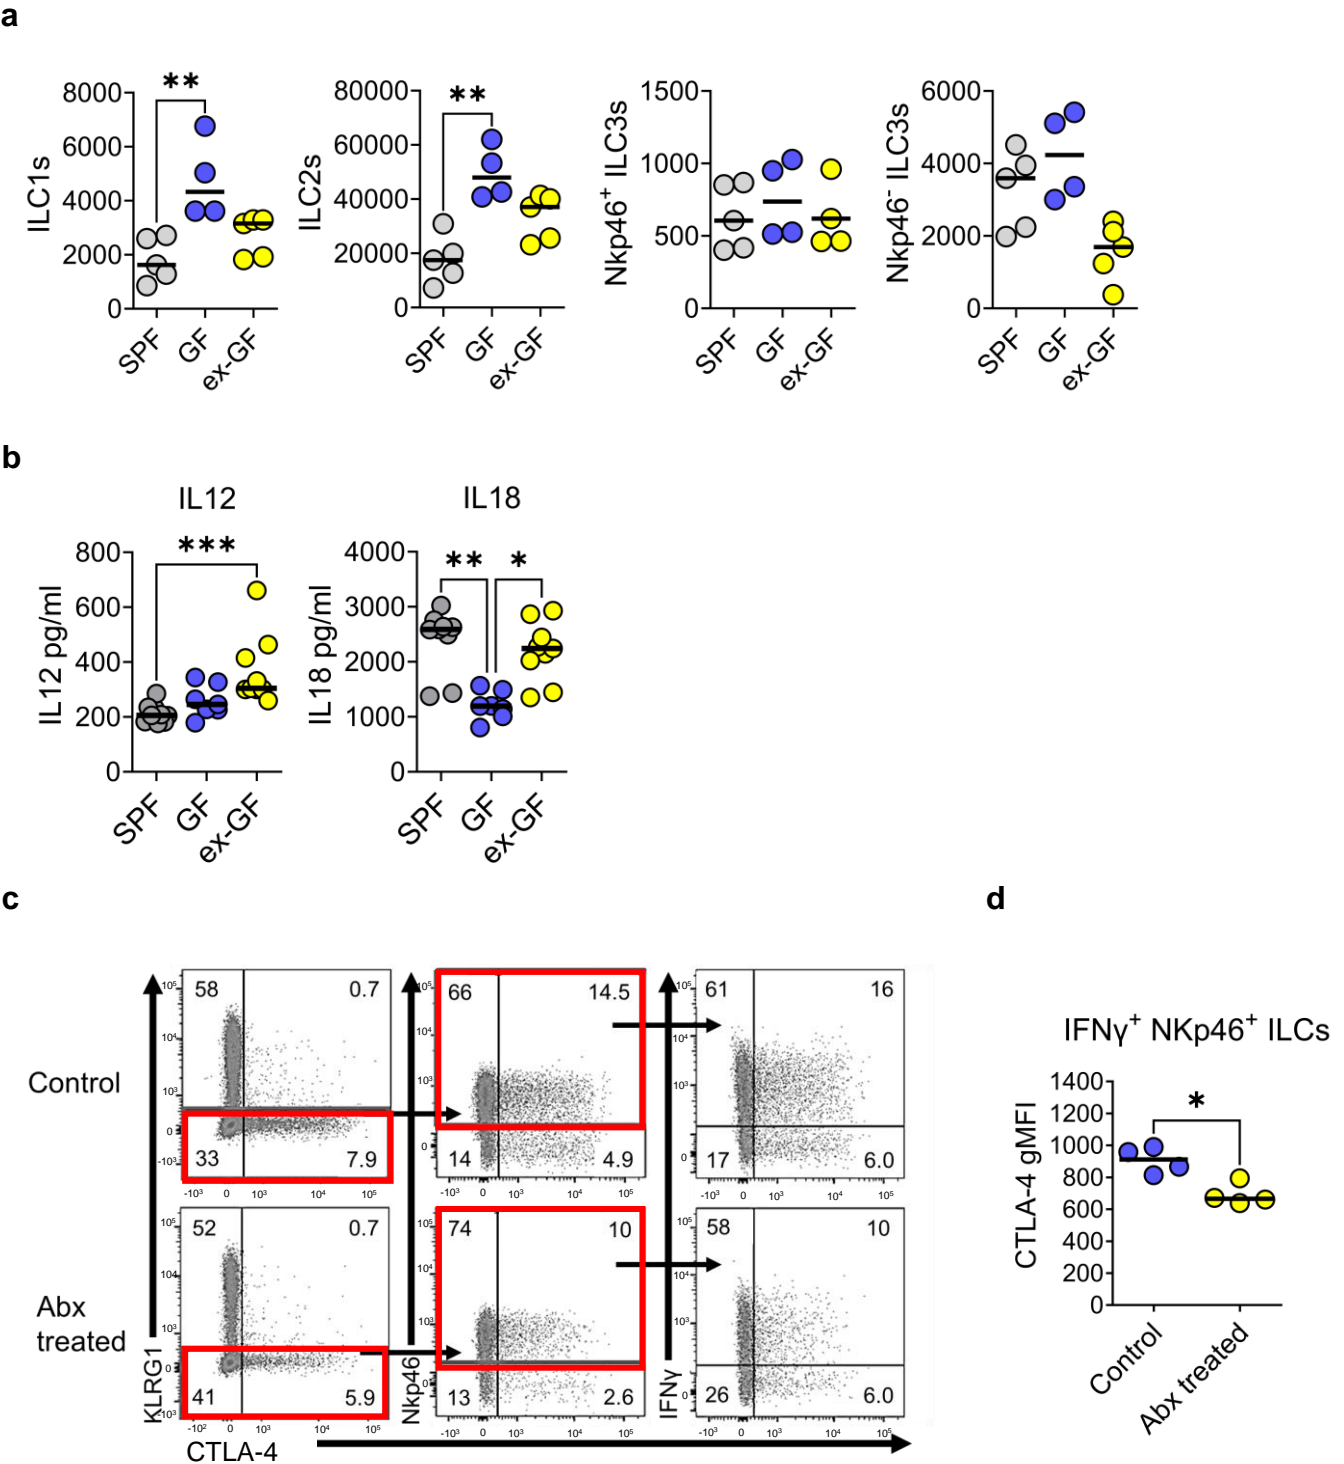

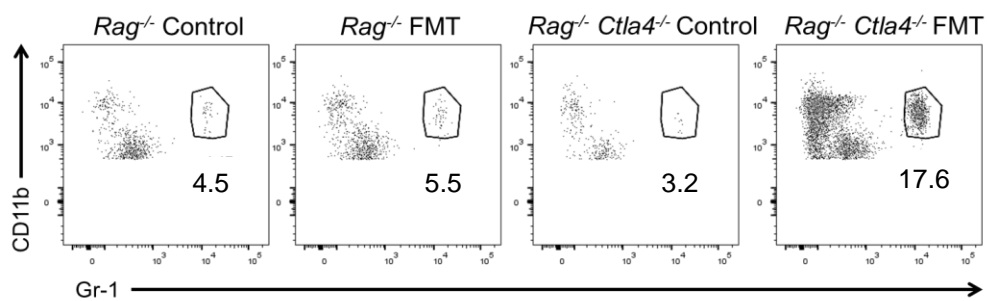

**Supplementary Figure 10. FMT causes an increase in neutrophils in *Rag2*<sup>-/-</sup> x *Ctla4*<sup>-/-</sup> mice**  
 Representative flow plots showing CD11b<sup>+</sup> Gr-1<sup>+</sup> neutrophils in *Rag2*<sup>-/-</sup> x *Ctla4*<sup>-/-</sup> mice.

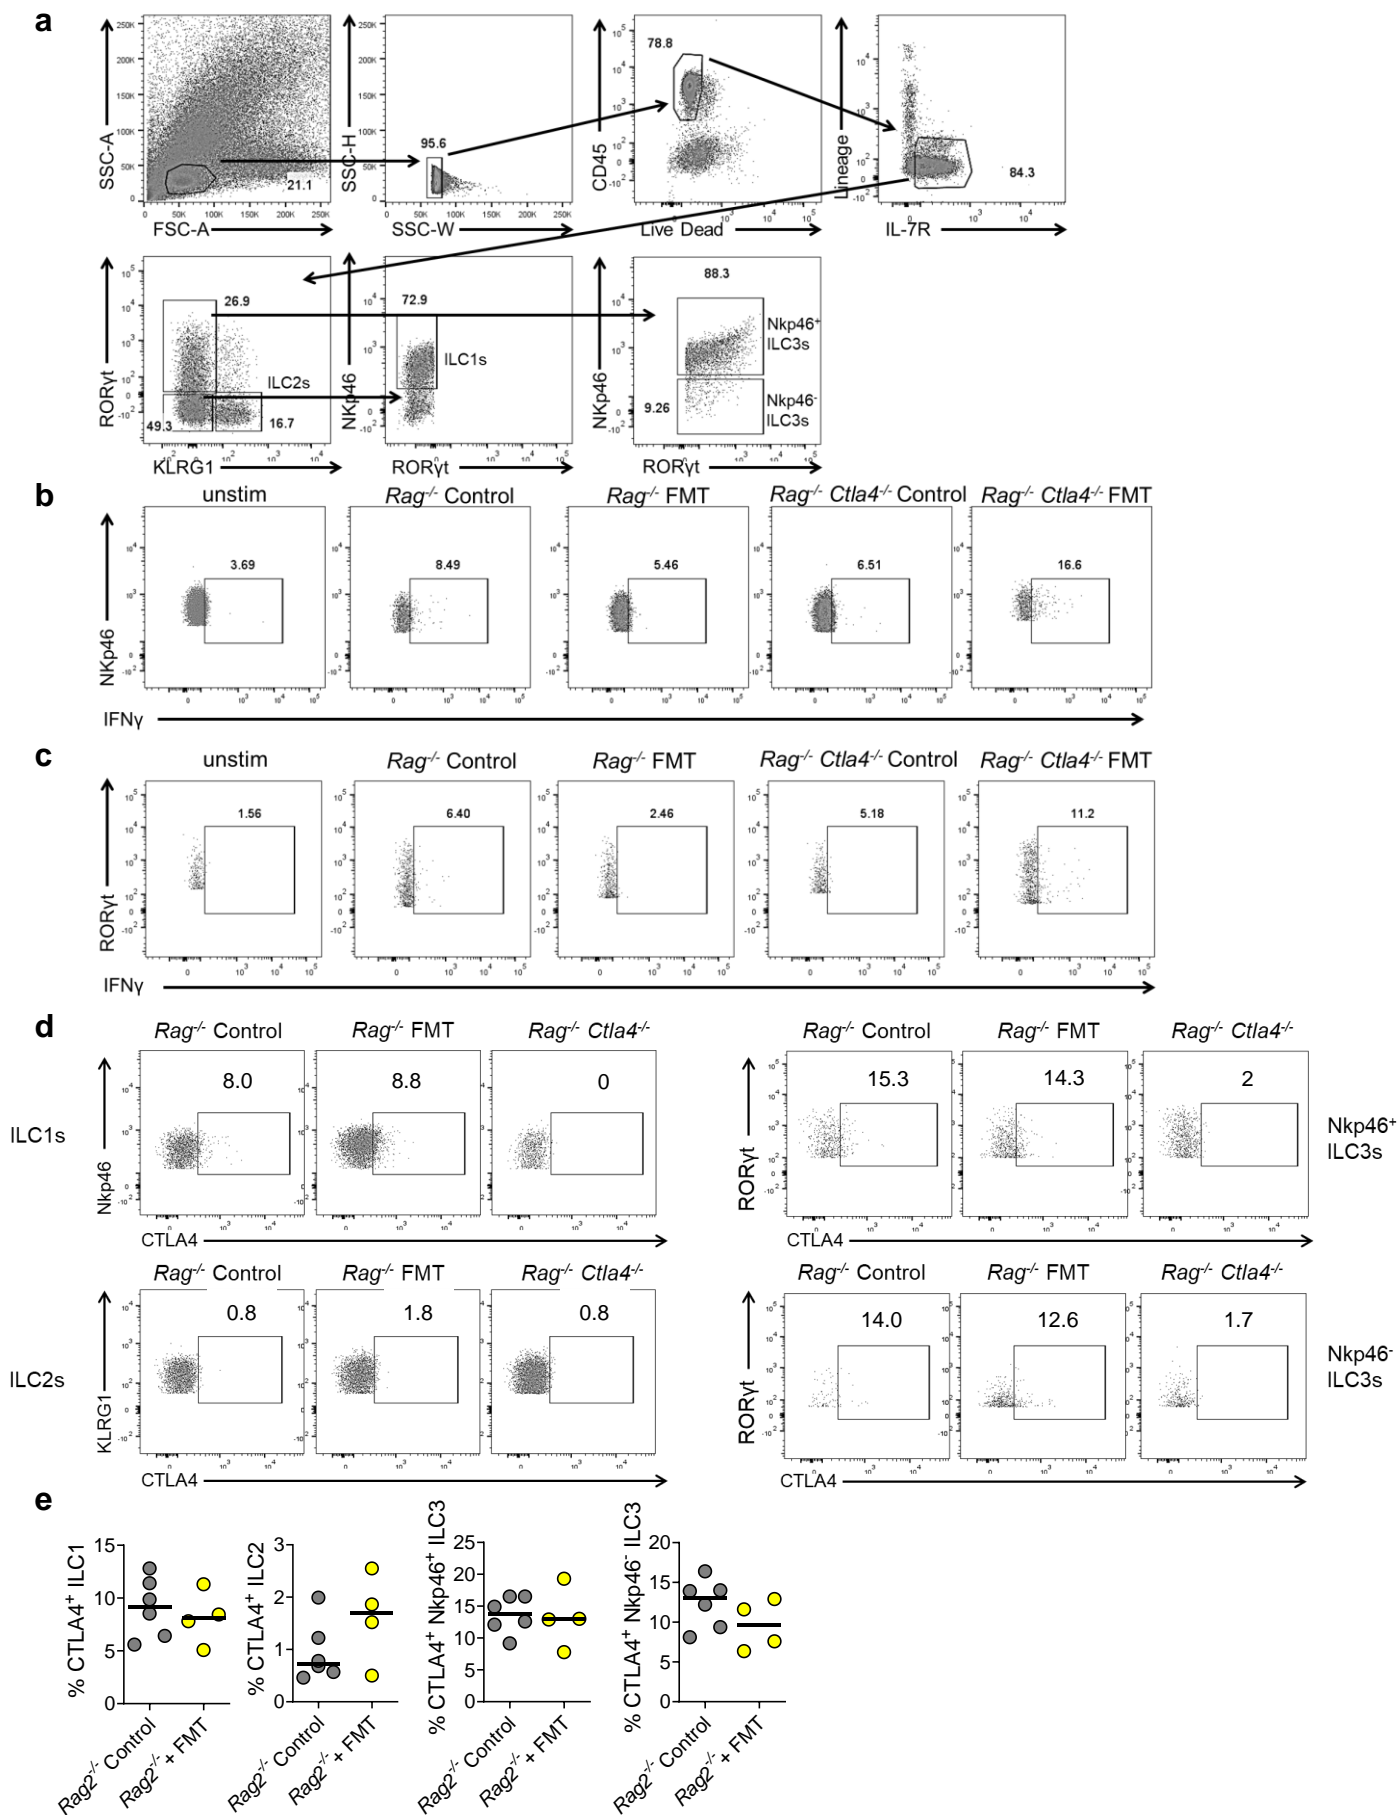

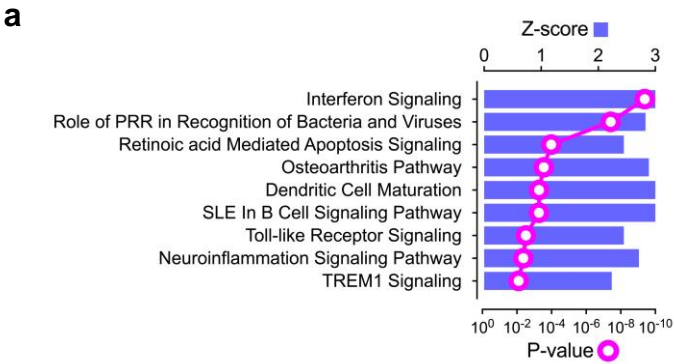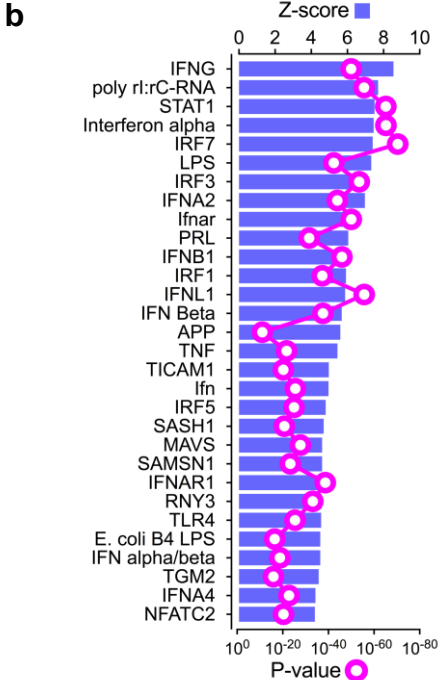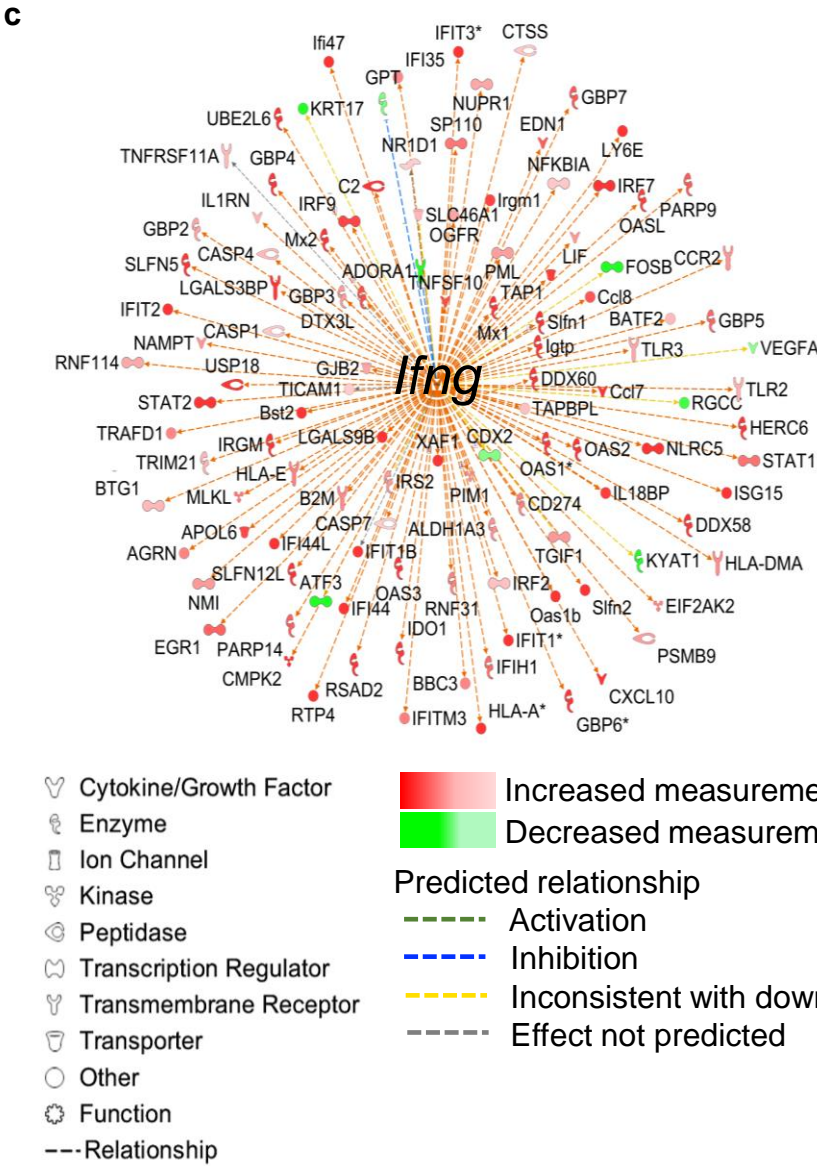

**Supplementary Figure 12. Pathway analysis and upstream network analysis identifies enrichment of IFN $\gamma$  regulated biological pathways in *Rag2*<sup>-/-</sup> x *Ctla4*<sup>-/-</sup>**

**(a)** Canonical pathways (Ingenuity Pathway Analysis, IPA) activated in colon segments from *Rag2*<sup>-/-</sup> x *Ctla4*<sup>-/-</sup> mice (n=4) compared to *Rag2*<sup>-/-</sup> mice (n=4). **(b)** Upstream regulators predicted to control the gene expression changes observed in *Rag2*<sup>-/-</sup> x *Ctla4*<sup>-/-</sup> mice (n=4) compared to *Rag2*<sup>-/-</sup> mice (n=4). **(c)** Causal network analysis of the top predicted upstream regulator (*Ifng*) observed in the colon of *Rag2*<sup>-/-</sup> x *Ctla4*<sup>-/-</sup> mice (n=4) in comparison with *Rag2*<sup>-/-</sup> mice (n=4), using IPA.

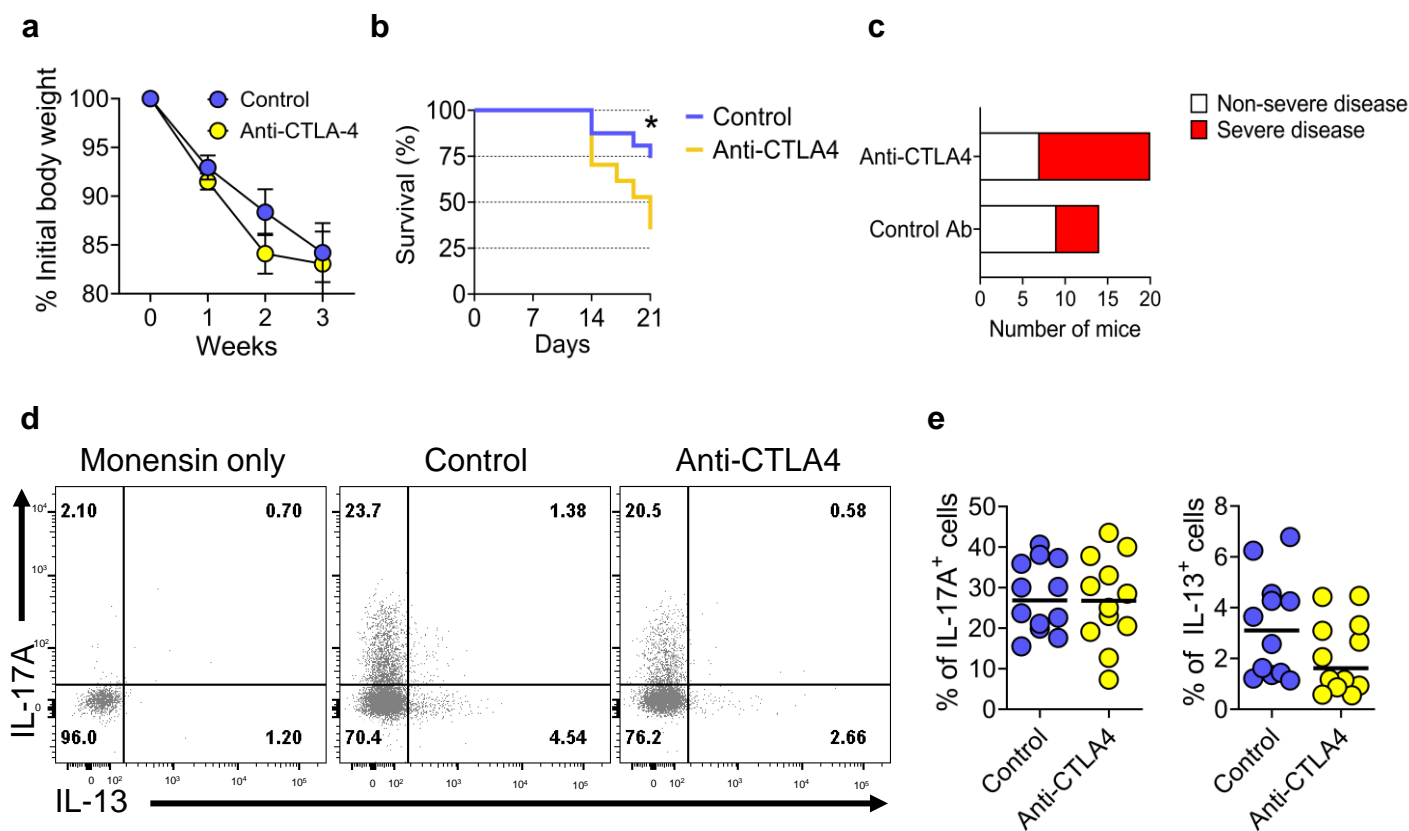

**Supplementary Figure 13. TRUC mice suffer worse disease when treated with CTLA-4 blockade**

(a) Weight loss, (b) survival curve and (c) severity index (based on weight loss of <15% initial body weight or having to be culled before the end point) between TRUC untreated mice (control) (n=12) compared to TRUC mice treated with anti-CTLA-4 (n=12) \* P<0.05 Logrank test. (d) Representative flow plot and (e) summary dot plot showing IL-17A and IL-13 producing ILCs between TRUC untreated mice (control) (n=12) compared to TRUC mice treated with anti-CTLA-4 (n=12).



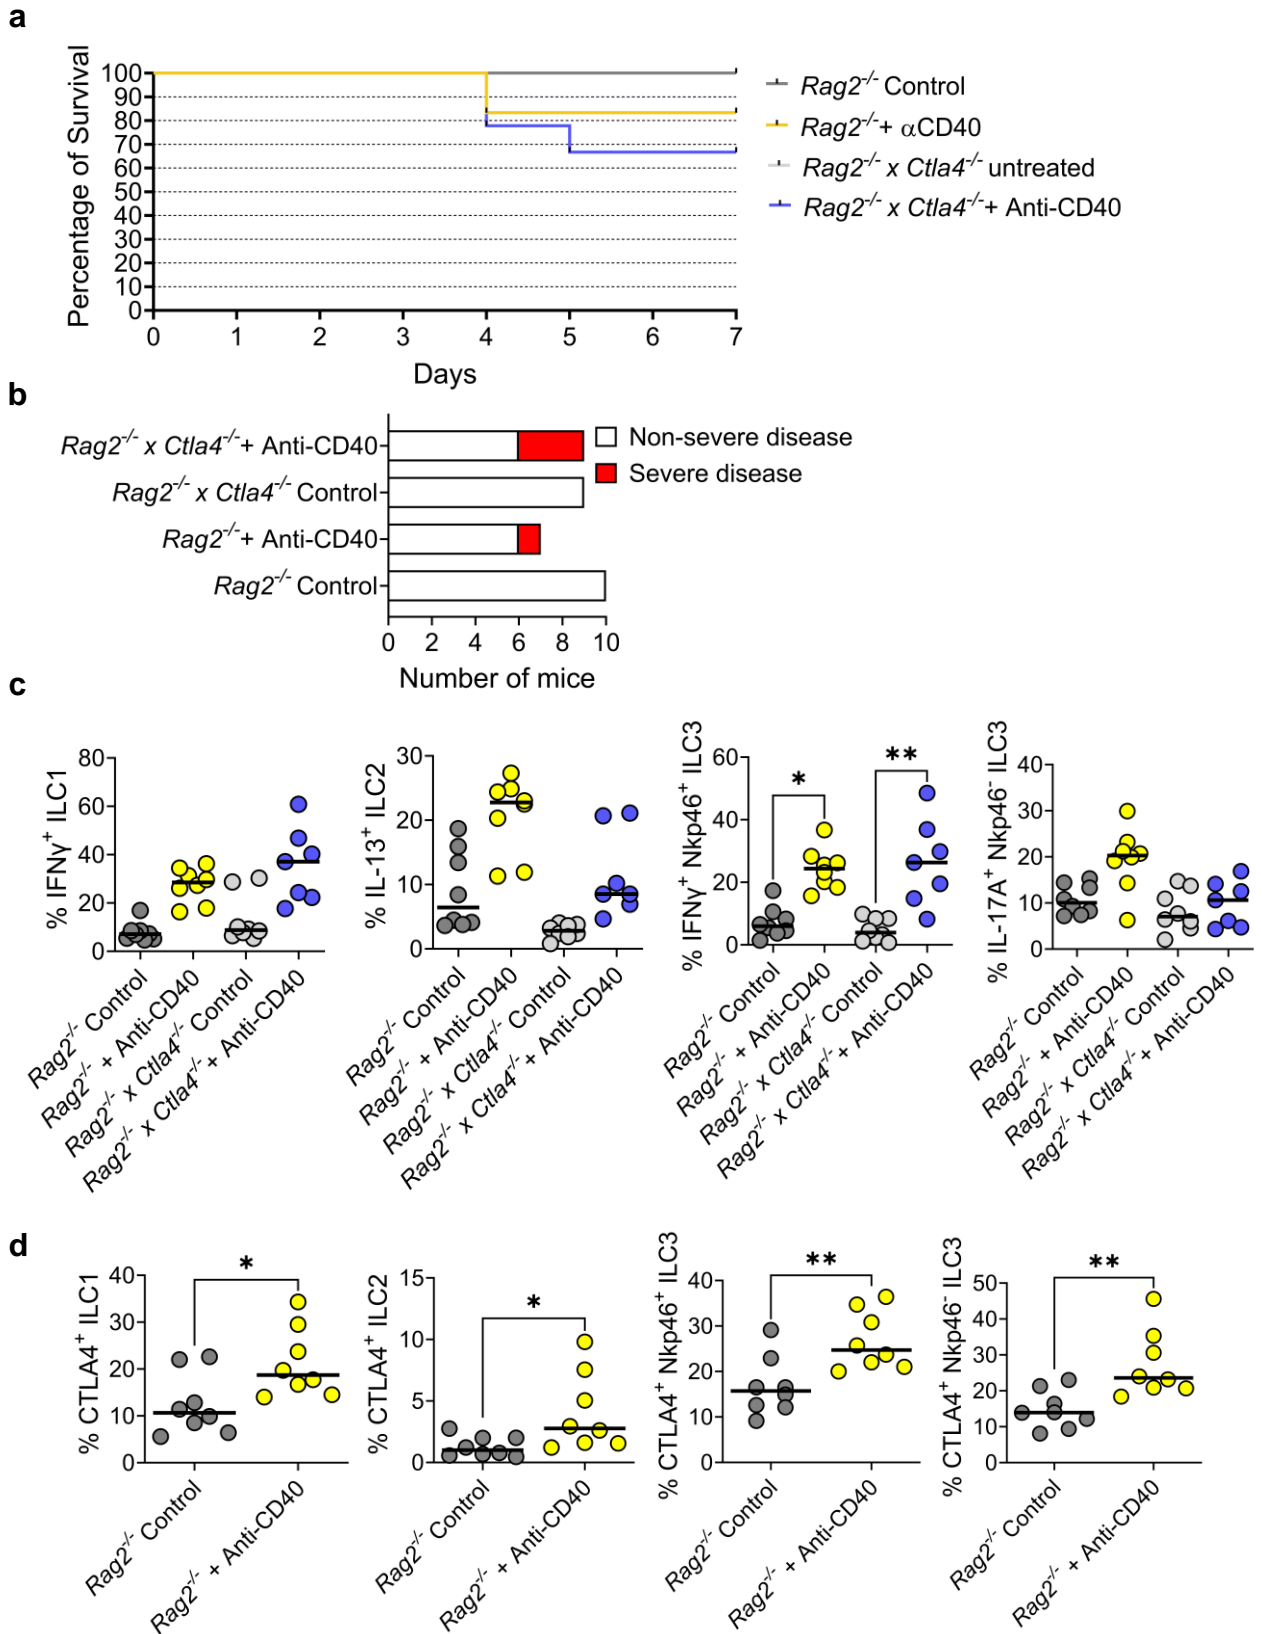

**Supplementary Figure 14.  $Rag2^{-/-}$  mice deficient for CTLA-4 suffer worse disease when treated with anti-CD40**

(a) Survival curve and (b) severity index (based on weight loss of <15% initial body weight or having to be culled before the end point) between control untreated BALB/c  $Rag2^{-/-}$  mice (n=8), BALB/c  $Rag2^{-/-}$  mice treated with anti-CD40 (n=8), untreated BALB/c  $Rag2^{-/-}$  x  $Ctla4^{-/-}$  mice (n=8) and BALB/c  $Rag2^{-/-}$  x  $Ctla4^{-/-}$  mice treated with anti-CD40 (n=7). (c) Summary dot plot showing cytokine producing ILCs between control untreated BALB/c  $Rag2^{-/-}$  mice (n=8), BALB/c  $Rag2^{-/-}$  mice treated with anti-CD40 (n=8), untreated BALB/c  $Rag2^{-/-}$  x  $Ctla4^{-/-}$  mice (n=8) and BALB/c  $Rag2^{-/-}$  x  $Ctla4^{-/-}$  mice treated with anti-CD40 (n=7). (d) Summary dot plot showing CTLA-4 expressing ILCs between control untreated BALB/c  $Rag2^{-/-}$  mice (n=8), BALB/c  $Rag2^{-/-}$  mice treated with anti-CD40 (n=8). \*  $P < 0.05$  \*\*  $P < 0.01$  \*\*\*  $P < 0.001$  2-sided Kruskal-Wallis Test for c and Mann Whitney U Test for d.

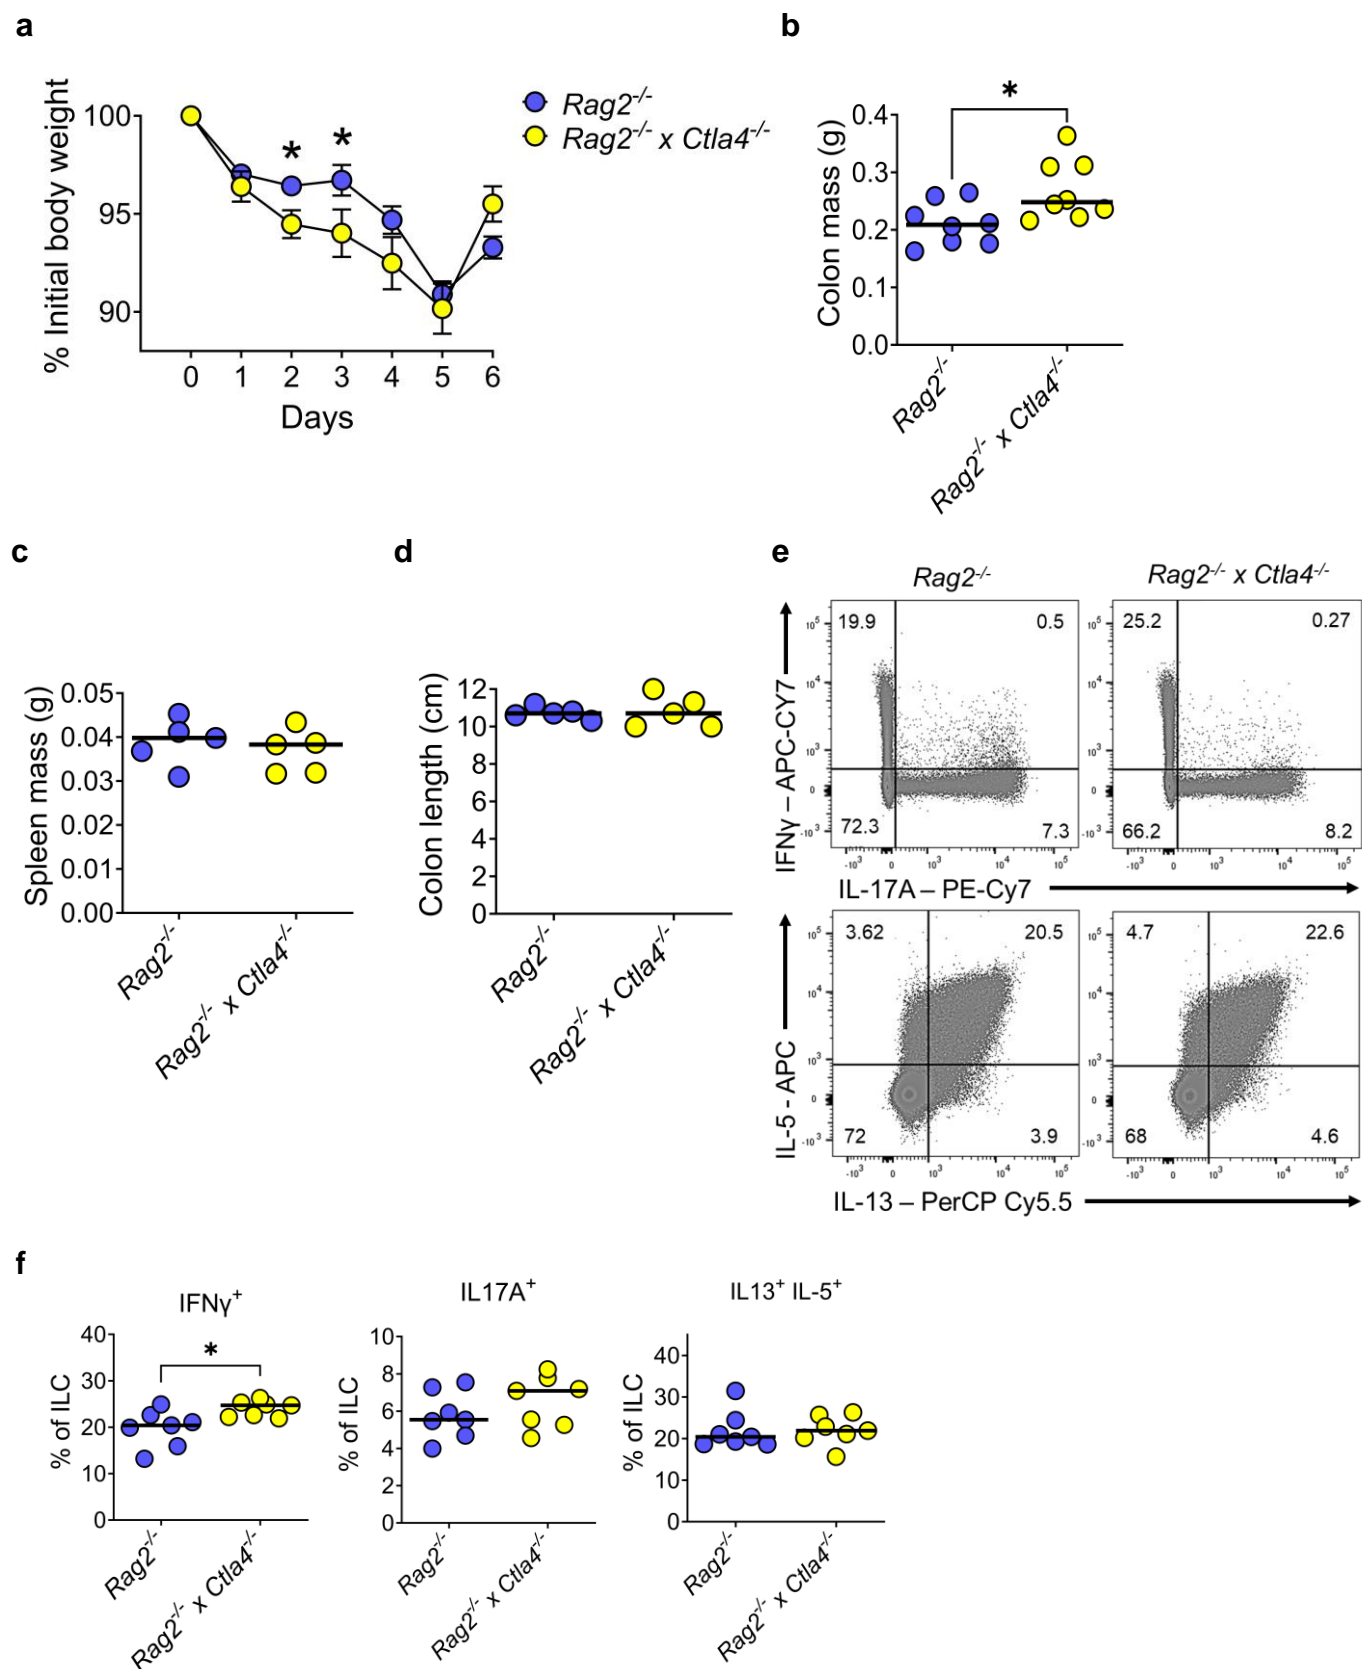

**Supplementary Figure 15. DSS treated *Rag2*<sup>-/-</sup> x *Ctla4*<sup>-/-</sup> mice suffer worse colitis**

(a) Weight change, (b) colon mass, (c) spleen mass and (d) colon length of *Rag2*<sup>-/-</sup> x *Ctla4*<sup>-/-</sup> mice (n=8, or n=5 for c and d) and *Rag2*<sup>-/-</sup> mice (n=8, or n=5 for c and d) treated with 5% DSS. Colon mass, spleen mass and colon length measured on Day 2. (e) Representative flow cytometry plots and (f) summary dot plot showing IFN $\gamma$ , IL17A and IL13<sup>+</sup>/IL5<sup>+</sup> cytokine production from ILCs from the cLP in *Rag2*<sup>-/-</sup> x *Ctla4*<sup>-/-</sup> mice (n=7) and *Rag2*<sup>-/-</sup> mice (n=7) treated with 5% DSS. \* P<0.05 Mann Whitney U test.



**a**

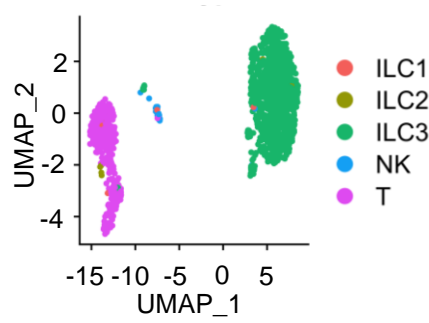

**b**

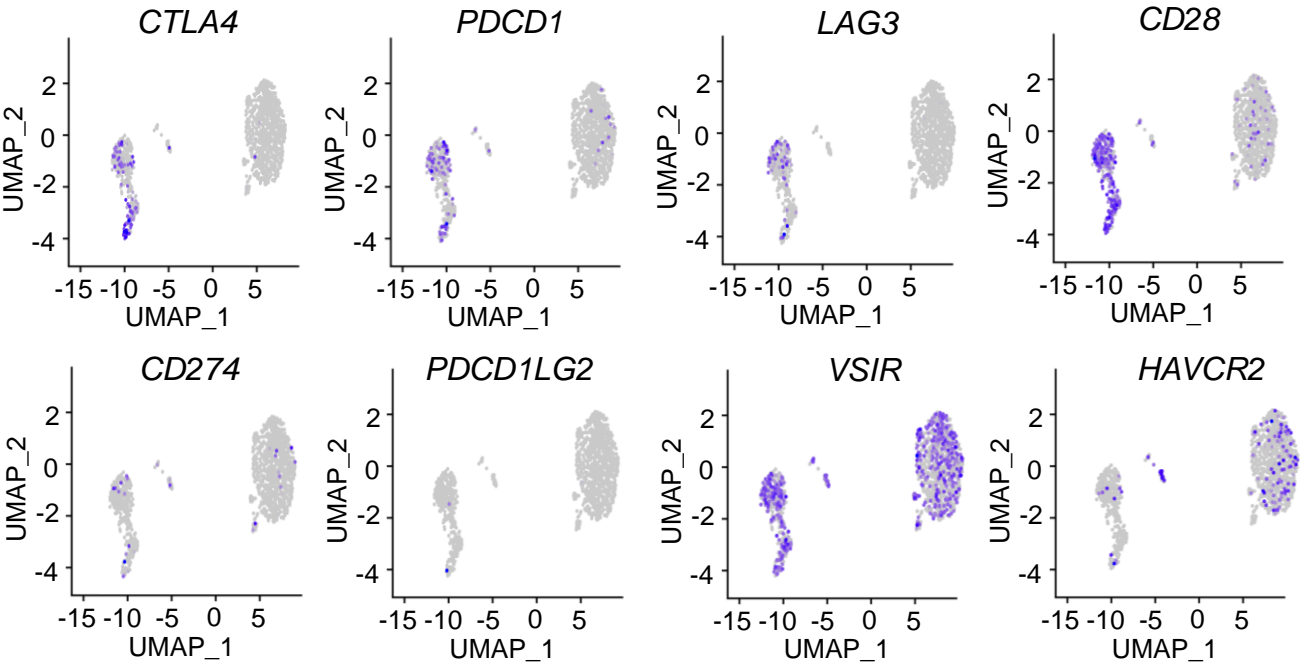

**Supplementary Figure 16. The immune checkpoint transcriptional landscape across human intestinal ILC clusters**

**(a)** UMAP plots and **(b)** violin plots showing the expression of different immune checkpoints across the three subsets of ILC, NK cells and T cells identified by Mazzurana et al.

**a**

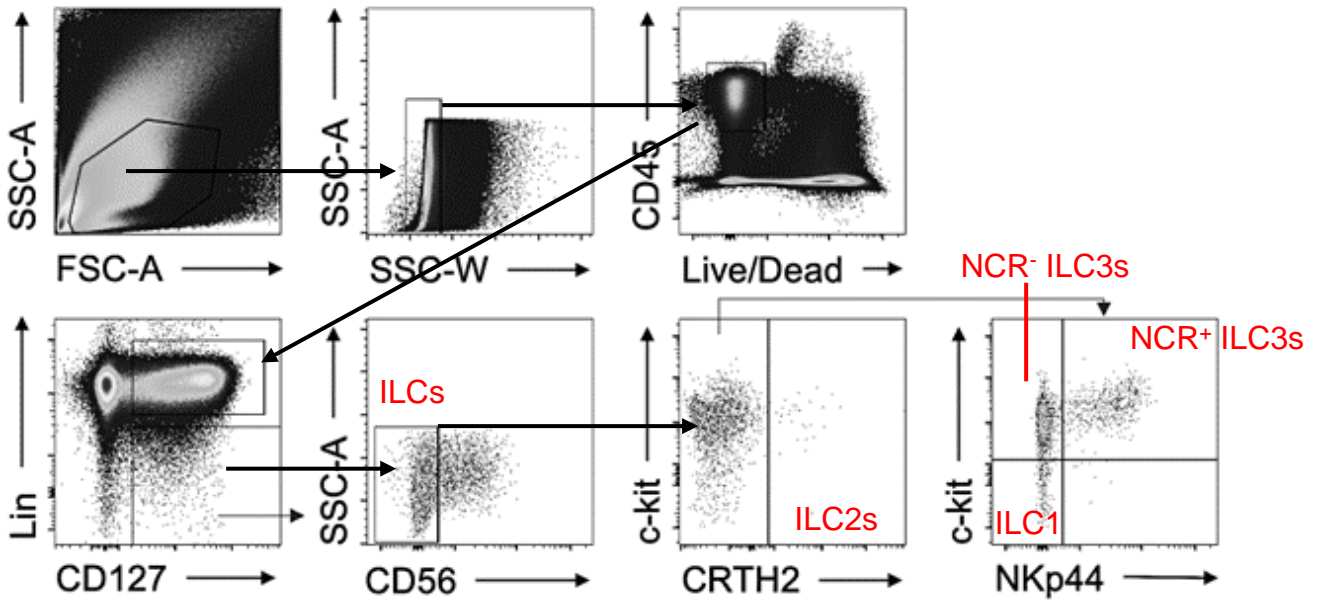

**b**

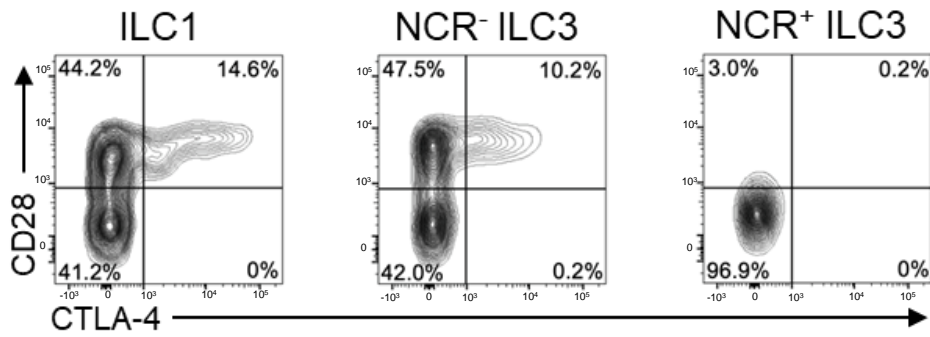

**Supplementary Figure 17. Analysis of human ILC subsets in IBD patients**  
(a) Gating strategy used for identifying the different ILC subsets from the colonic lamina propria mononuclear cells from biopsies of IBD patients and healthy controls (b) Representative flow plot showing co-expression of CD28 and CTLA-4 on ILC1s, NCR<sup>-</sup> ILC3s and NCR<sup>+</sup> ILC3s

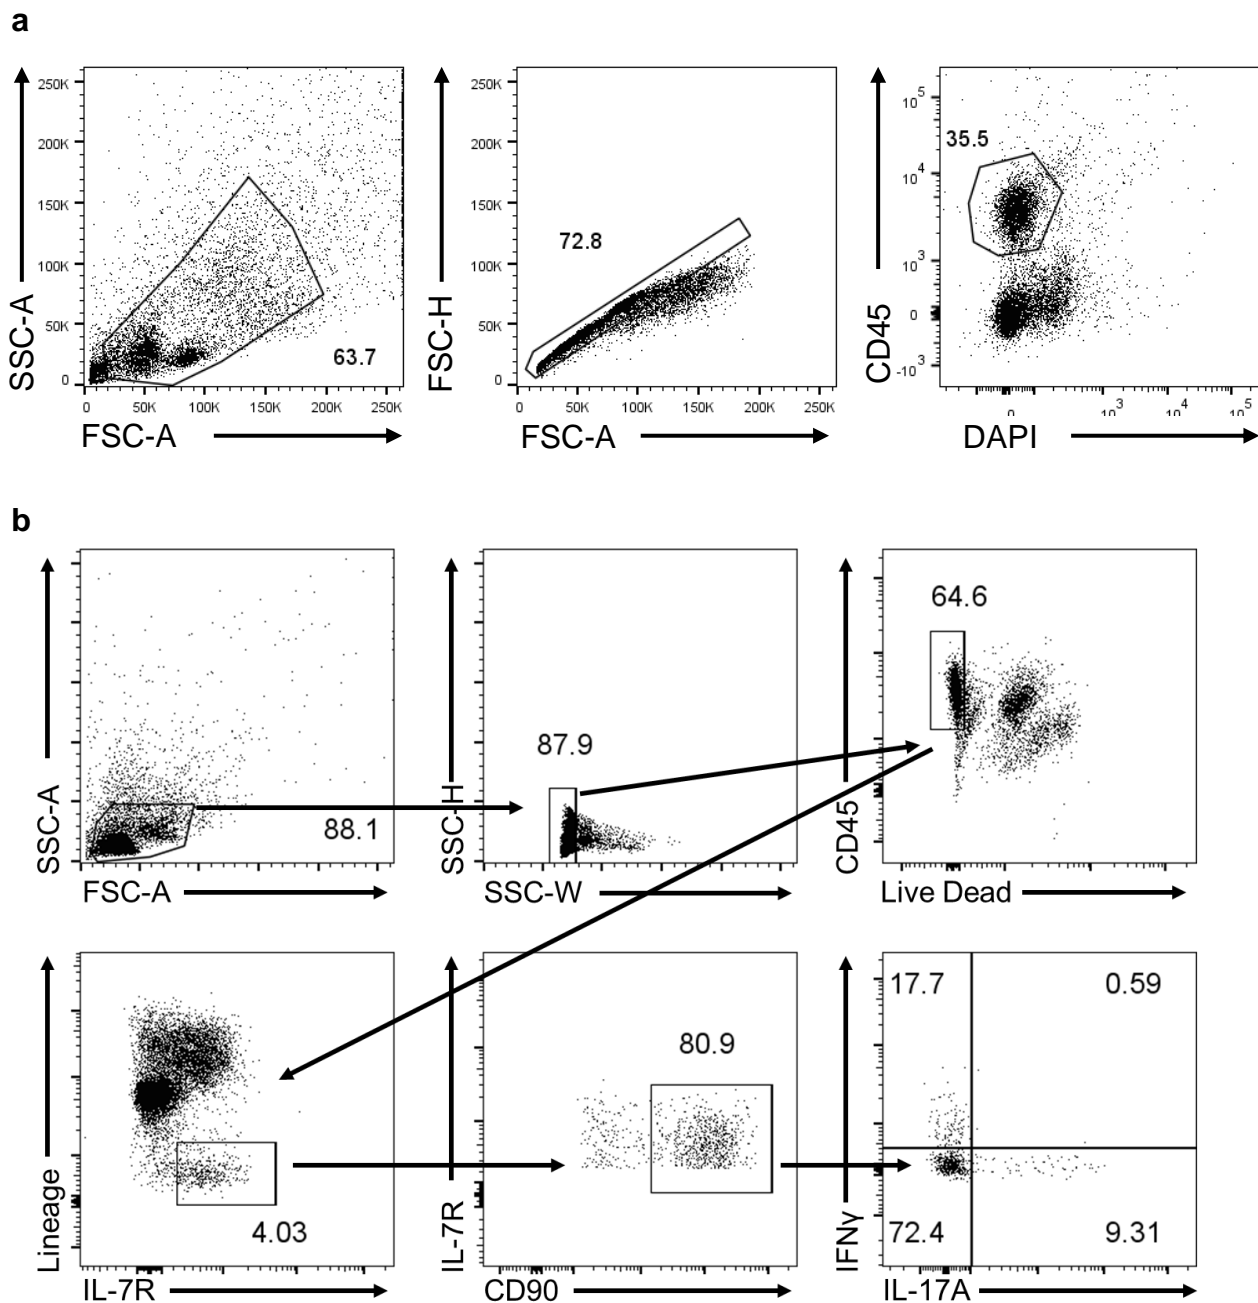

**Supplementary Figure 18. Gating strategies for sorting and analysis of murine CPI-induced colitis**  
**(a)** Gating strategy used for sorting Live CD45 lymphocytes which were then immediately run on the 10X Genomics Chromium **(b)** Gating strategy used for identifying the different ILC subsets from the colonic lamina propria mononuclear cells from wild-type mice treated with CPI.

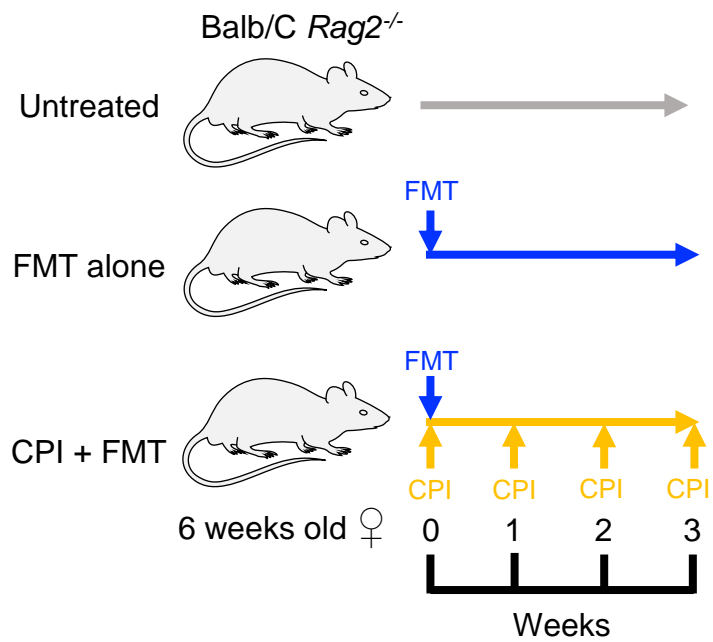

**Supplementary Figure 19. Experimental plan for inducing CPI-colitis in *Rag2*<sup>-/-</sup> mice**  
Schematic of the experimental plan for the CPI-colitis in *Rag2*<sup>-/-</sup> mice.

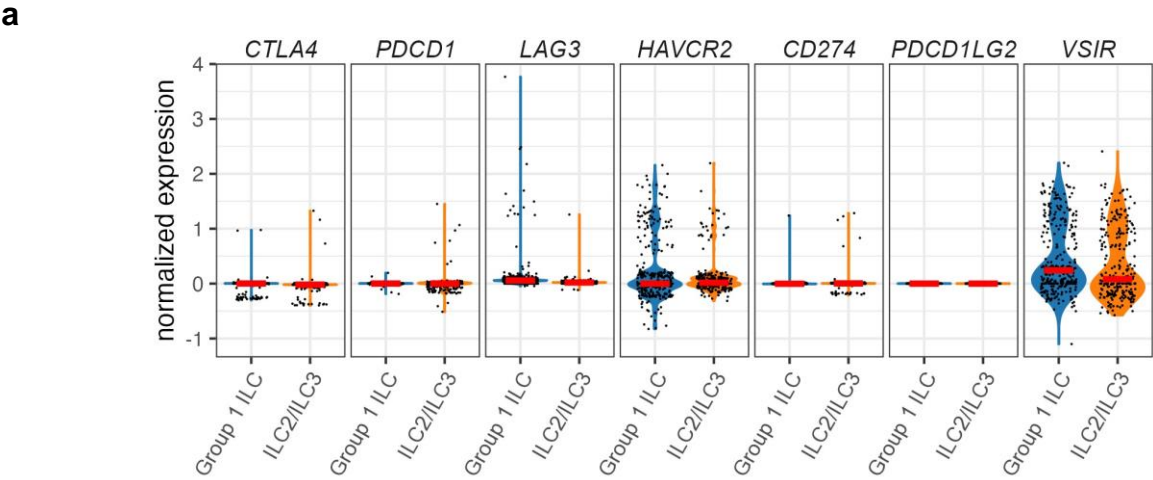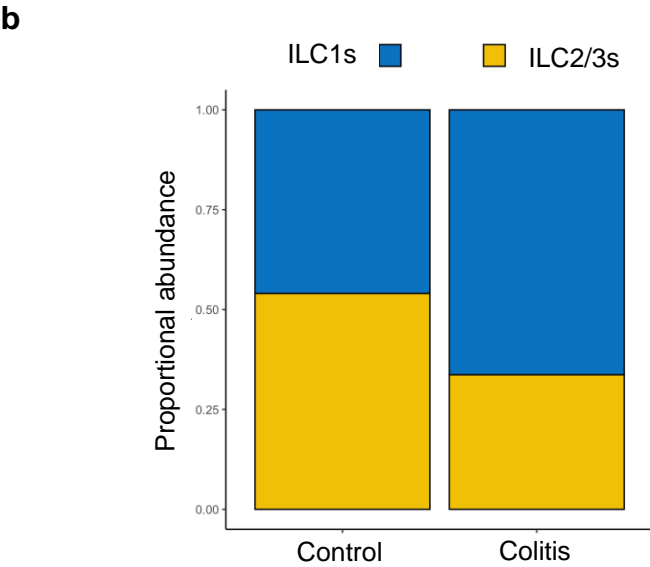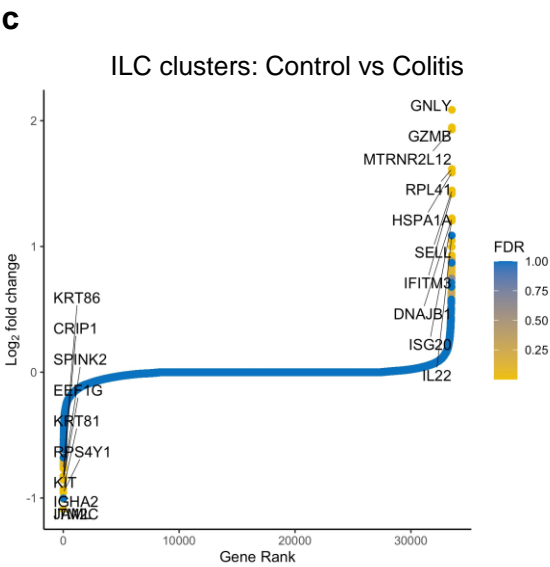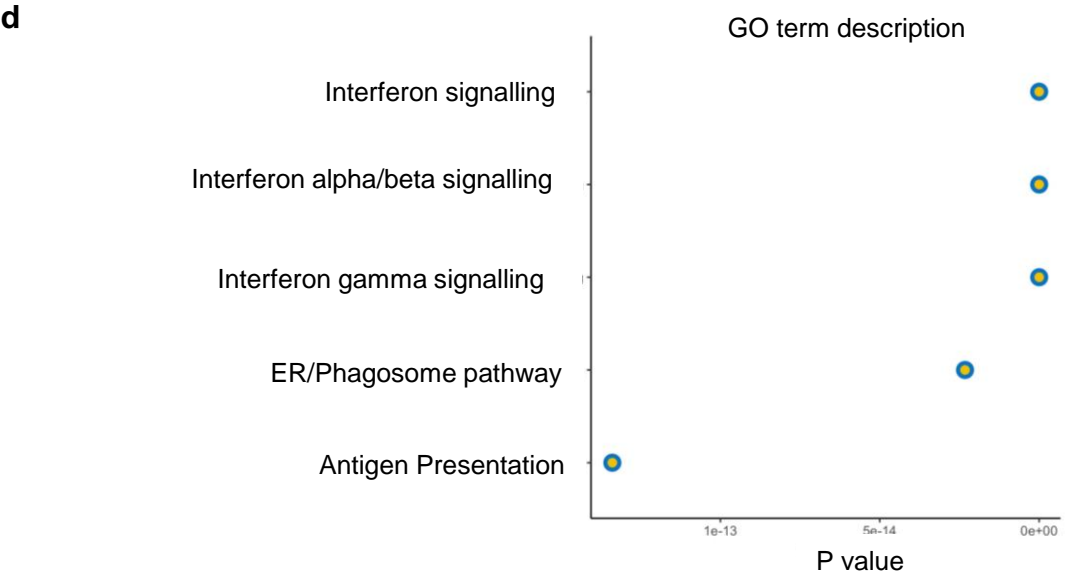

**Supplementary Figure 20. ILC1 subsets are expanded in patients with CPI-colitis**  
(a) Violin plots of the normalised gene expression of typical immune checkpoint genes from healthy controls between the two ILC clusters identified by Luoma et al. (b) Cell cluster abundance proportion changes between the 2 ILC clusters identified by Luoma et al. (c) Chair plot showing differentially expressed genes in the ILC clusters ranked by increasing fold change. (d) Pathway analysis showing the most significantly increased GO pathways in the ILCs clusters.

**Supplementary Table 1. List of flow cytometry antibodies used**

| <b>Antibody</b>                | <b>Clone</b>                                                                                                       | <b>Species Reactivity</b> | <b>Fluorochrome</b>         | <b>Company</b>            |
|--------------------------------|--------------------------------------------------------------------------------------------------------------------|---------------------------|-----------------------------|---------------------------|
| Live Dead                      |                                                                                                                    | Both                      | Fixable blue or aqua or 700 | Thermo Fisher             |
| CD45.2                         | 104                                                                                                                | Murine                    | BUV395                      | Biolegend                 |
| Hematopoietic Lineage Cocktail | consisting of:<br>CD3 (17A2), B220 (RA3-6B2), CD11b (M1/70), TER-119 (TER-119), Gr-1 (RB6-8C5)                     | Murine                    | Fitc                        | Thermo Fisher             |
| CD5                            | 53-7.3                                                                                                             | Murine                    | Fitc                        | Thermo Fisher             |
| CD127                          | A7R34                                                                                                              | Murine                    | APC                         | Biolegend                 |
| CD28                           | 37.51                                                                                                              | Murine                    | Biotin                      | Biolegend                 |
| Streptavidin                   |                                                                                                                    |                           | PE                          | BD                        |
| ROR $\gamma$ t                 | Q31-378                                                                                                            | Murine                    | BV785                       | BD                        |
| IL-10                          | JES5-16E3                                                                                                          | Murine                    | PE                          | Thermo Fisher             |
| IL-5                           | TRFK5                                                                                                              | Murine                    | PE                          | Biolegend                 |
| IL-13                          | eBio13A                                                                                                            | Murine                    | PerCP-ef710                 | Thermo Fisher             |
| IFN $\gamma$                   | XMG1.2                                                                                                             | Murine                    | BUV737                      | Biolegend / Thermo Fisher |
| IL-17A                         | eBio17B7                                                                                                           | Murine                    | PE-Cy7                      | Thermo Fisher             |
| Nkp46                          | 29A1.4                                                                                                             | Murine                    | BV605                       | Biolegend                 |
| CCR6                           | 29-21.17                                                                                                           | Murine                    | BV421                       | Biolegend                 |
| CTLA-4                         | UC10-4F10-11                                                                                                       | Murine                    | PE-CF594                    | BD                        |
| KLRG1                          | 2F1                                                                                                                | Murine                    | APC-Cy7                     | Thermo Fisher             |
| Gr-1                           | RB6-8C5                                                                                                            | Murine                    | Fitc                        | Thermo Fisher             |
| CD11b                          | M1/70                                                                                                              | Murine                    | PE-Cy7                      | BD Biosciences            |
| CD90.2                         | 53-2.1                                                                                                             | Murine                    | ef450                       | Thermo Fisher             |
| ICOS                           | C398.4A                                                                                                            | Murine                    | PE-Cy7                      | Thermo Fisher             |
| ST2                            | RMST2-2                                                                                                            | Murine                    | BUV737                      | Thermo Fisher             |
| Hematopoietic Lineage Cocktail | consisting of:<br>CD2 (RPA-2.10), CD3 (OKT3), CD19 (HIB19), CD14 (61D3), CD16 (CB16), CD56 (TULY56), CD235a (HIR2) | Human                     | Fitc                        | Thermo Fisher             |
| CRTH2                          | BM16                                                                                                               | Human                     | BV421                       | Biolegend                 |
| CD56                           | QA17A16                                                                                                            | Human                     | Pacific Blue                | Biolegend                 |
| c-kit                          | ACK2                                                                                                               | Human                     | PE-Cy7                      | Thermo Fisher             |
| NKp44                          | P44-8                                                                                                              | Human                     | APC                         | Biolegend                 |
| CTLA-4                         | BN13                                                                                                               | Human                     | PE                          | Biolegend                 |
| CD28                           | CD28.2                                                                                                             | Human                     | PE-Dazzle 594               | Biolegend                 |
| CD45                           | HI30                                                                                                               | Human                     | Pacific Orange              | Thermo Fisher             |
